# Supplementary material for: Validating Anti-Infective Activity of Pleurotus Opuntiae via Standardization of Its Bioactive Mycoconstituents through Multimodal Biochemical Approach
Source: MDPI journal article supplement (doi:10.3390/coatings11040484), 2021-04-20
Supplement: s1 [file s1]

# Supplementary Materials: Validating Anti-Infective Activity of *Pleurotus Opuntiae* via Standardization of Its Bioactive Mycoconstituents through Multimodal Biochemical Approach

Aprajita Tiwari Pandey <sup>1</sup>, Ishan Pandey <sup>2</sup>, Anurag Kanase <sup>3</sup>, Amita Verma <sup>4</sup>, Beatriz Garcia-Canibano <sup>5</sup>, Sarada Prasad Dakua <sup>6</sup>, Shidin Balakrishnan <sup>6,\*</sup> and Mohan Prasad Singh <sup>1,\*</sup>

<sup>1</sup> Centre of Biotechnology, Nehru Science Complex, University of Allahabad, Prayagraj 211002, India; tiwari.aprajita2011@gmail.com

<sup>2</sup> Department of Pathology, Motilal Nehru Medical College, Prayagraj 211001, India; ishan.pandey411@gmail.com

<sup>3</sup> Department of Bioengineering, Northeastern University, Boston, MA 02115, USA; kanase.a@northeastern.edu

<sup>4</sup> Bioorganic and Medicinal Chemistry Research Laboratory, Department of Pharmaceutical Science, Sam Higginbottom University of Agriculture, Technology and Sciences, Prayagraj 211007, India; amitaverma.dr@gmail.com

<sup>5</sup> Neurosciences Institute, Hamad Medical Corporation, Doha 3050, Qatar; BCanibano@hamad.qa

<sup>6</sup> Department of Surgery, Hamad Medical Corporation, Doha 3050, Qatar; SDakua@hamad.qa

\* Correspondence: sbalakrishnan1@hamad.qa (S.B.); mpsingh.16@gmail.com (M.P.S.)

**Citation:** Tiwari Pandey, A.; Pandey, I.; Kanase, A.; Verma, A.; Canibano, B.G.; Dakua, S.P.; Balakrishnan, S.; Singh, M.P. Validating Anti-Infective Activity of *Pleurotus Opuntiae* via Standardization of Its Bioactive Mycoconstituents through Multimodal Biochemical Approach. *Coatings* **2021**, *11*, 484. <https://doi.org/10.3390/coatings11040484>

Received: 19 March 2021

Accepted: 17 April 2021

Published: 20 April 2021

**Publisher's Note:** MDPI stays neutral with regard to jurisdictional claims in published maps and institutional affiliations.

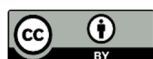

**Copyright:** © 2021 by the authors. Licensee MDPI, Basel, Switzerland. This article is an open access article distributed under the terms and conditions of the Creative Commons Attribution (CC BY) license (<http://creativecommons.org/licenses/by/4.0/>).

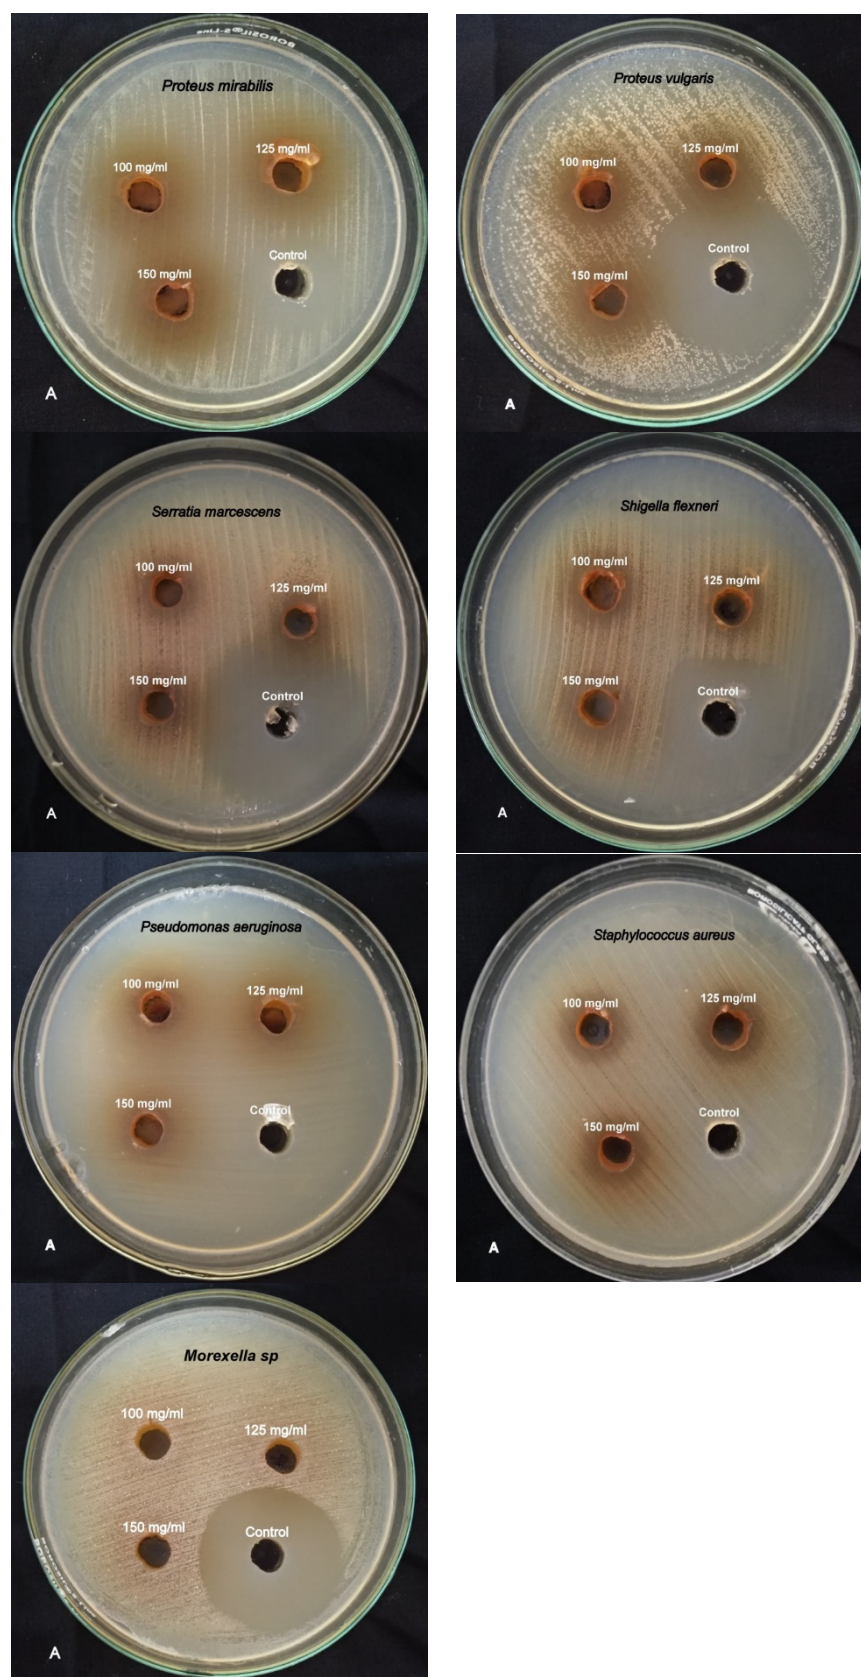

(A)

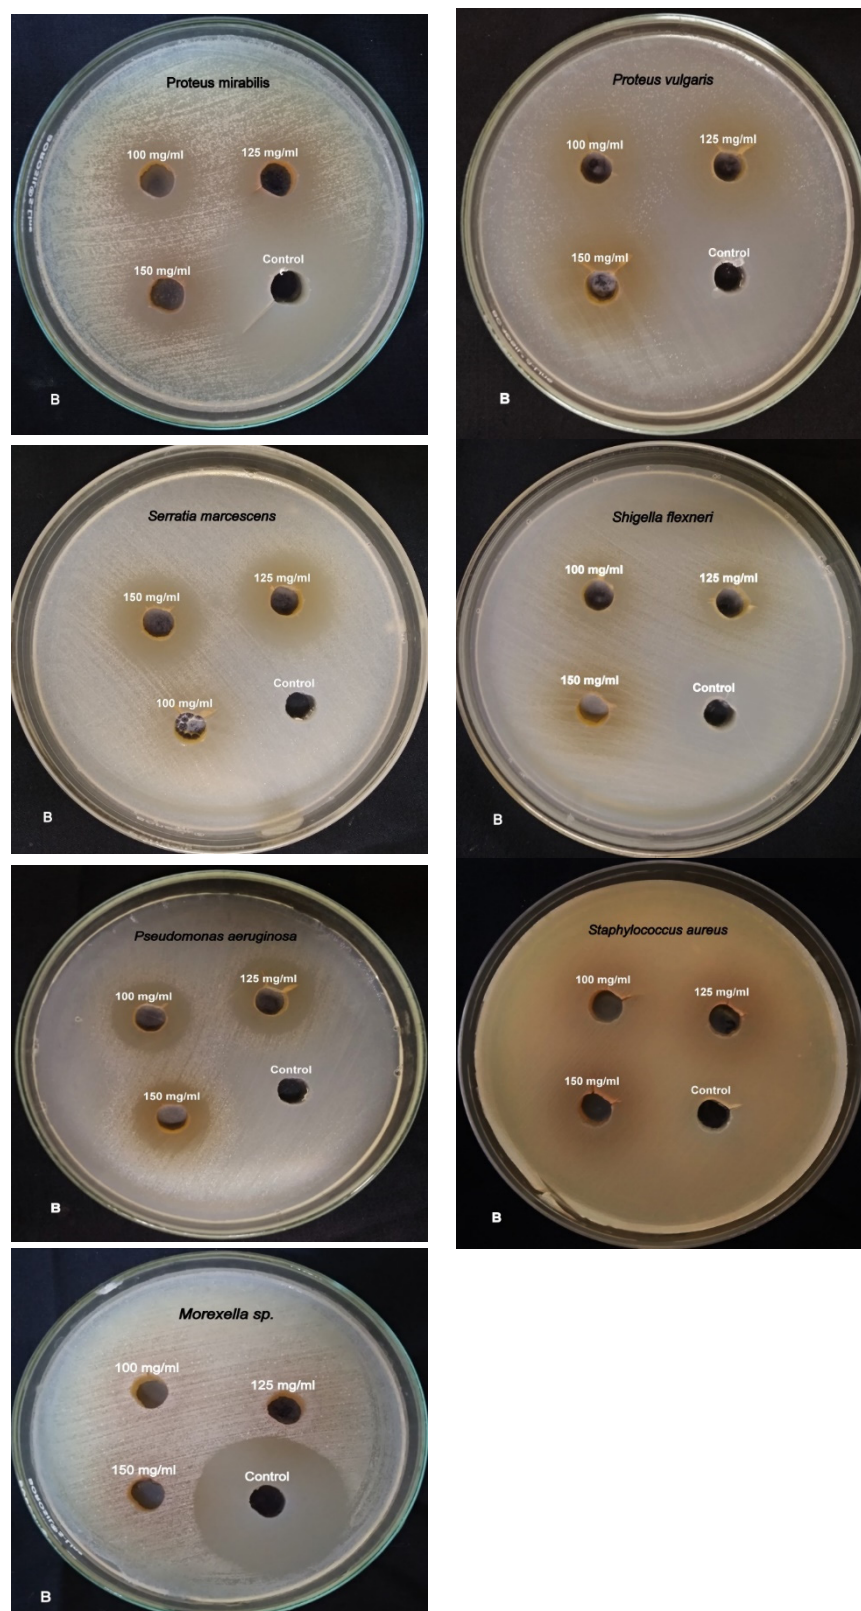

(B)

**Figure S1.** (A) Shows antimicrobial activity of *P. opuntiae* (Ethanol extract) against pathogens; (B) Shows antimicrobial activity of *P. opuntiae* (Methanol extract) against pathogens Control: Gram positive- penicillin, Gram negative- ciprofloxacin antibiotic.



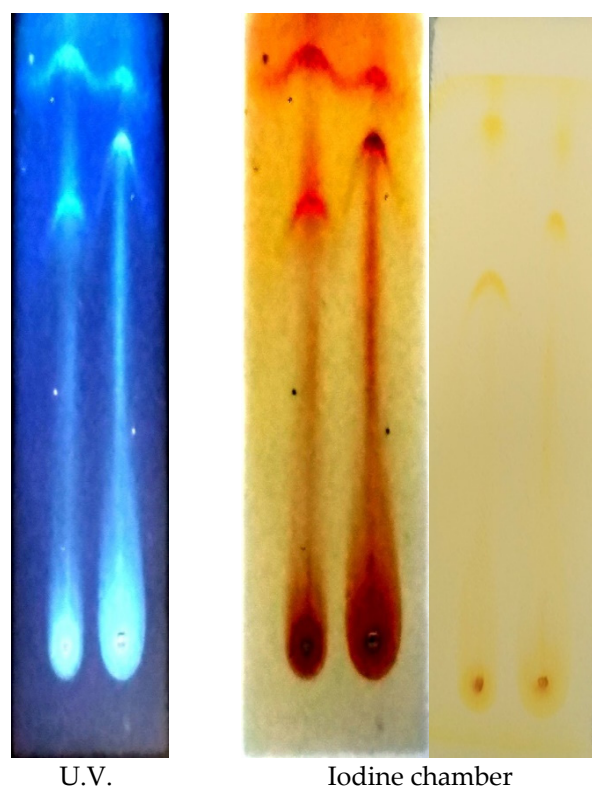

**Figure S2.** Shows TLC profile of ethanol and methanol extracts of *P. opuntiae* in 100% Chloroform solvent system.

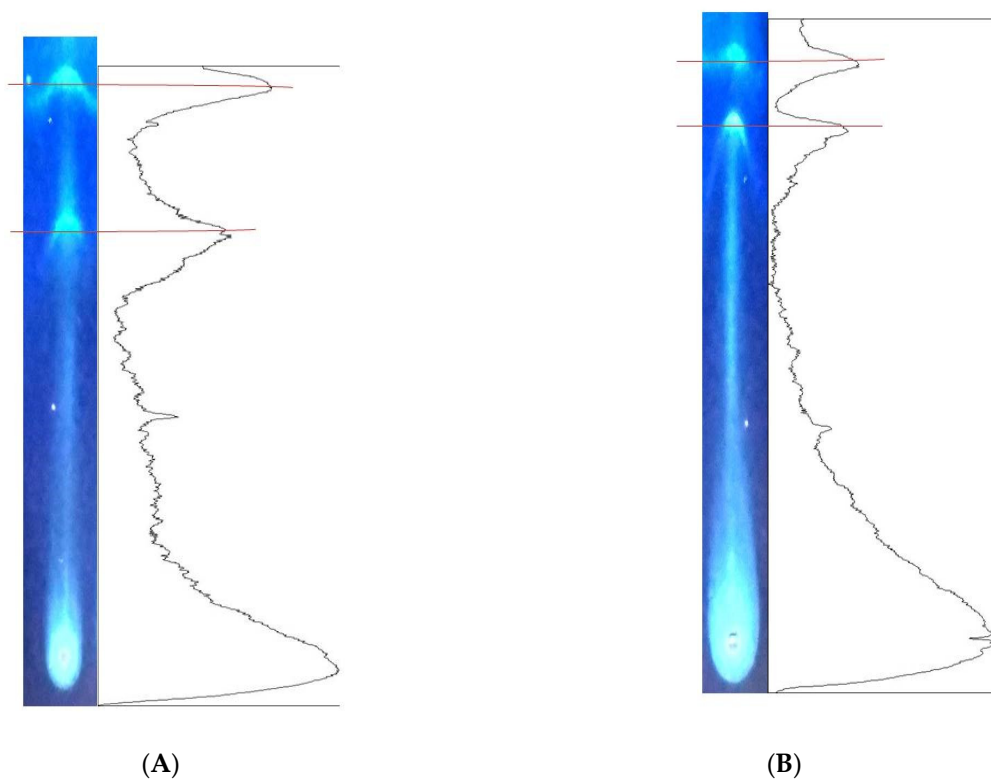

**Figure S3.** TLC and ImageJ program chromatograms of (A) Ethanol extract fraction and (B) methanol fraction of *P. opuntiae* in 100% chloroform which shows only 2 spots respectively (Total 4 spots).

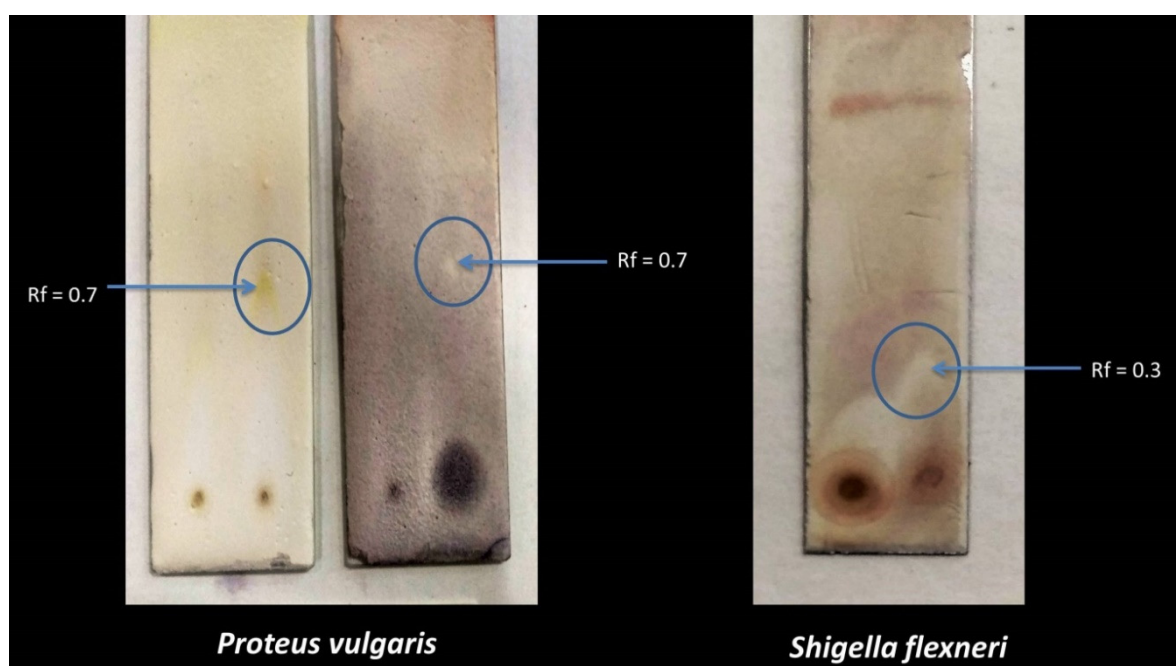

**Figure S4.** Shows the bioautography result of *Proteus vulgaris* (before spraying and after spraying INT) and *Shigella flexneri* (after spraying INT) in silica gel coated plate.

**Table S1.** Standardization of different solvent systems for TLC to separate compounds in form of total no. of spots in ethanol and methanol extracts of *P. opuntiae*.

| S. No. | Solvent Systems                           | Ratio of Solvent Systems (mL) | Total No. of Spots (Ethanol and Methanol) |
|--------|-------------------------------------------|-------------------------------|-------------------------------------------|
| 1.     | Chloroform + Ethyl acetate + Formic acid  | 5:4:1                         | 2                                         |
| 2.     | Ethylacetate + methanol + distilled water | 40:5:5                        | 2                                         |
| 3.     | Chloroform + Ethyl acetate + Formic acid  | 5:4:1.5                       | 2                                         |
| 4.     | Butanol+acetic acid + distilled water     | 8:2:2                         | 2                                         |
| 5.     | Chloroform + Ethyl acetate + Formic acid  | 8:2:1                         | 2                                         |
| 6.     | Butanol + acetic acid + distilled water   | 8:1:0.5                       | 2                                         |
| 7.     | Chloroform + methanol + Formic acid       | 7:1:1                         | 3                                         |
| 8.     | 100% chloroform                           | 100                           | 4                                         |
| 9.     | Chloroform + hexane                       | 8:2                           | 5                                         |
| 10.    | Chloroform + Ethyl acetate                | 7:3                           | 3                                         |
| 11.    | Chloroform + methanol                     | 9:1                           | 3                                         |
| 12.    | Chloroform + Ethyl acetate                | 5:5                           | 3                                         |
| 13.    | Chloroform+methanol                       | 9.5:0.5                       | 2                                         |
| 14.    | Chloroform + Ethyl acetate + Formic acid  | 3:6:0.2                       | 3                                         |
| 15.    | Chloroform + Ethyl acetate                | 5:5                           | 3                                         |
| 16.    | Chloroform + Ethyl acetate + Formic acid  | 5:4:1                         | 3                                         |
| 17.    | Chloroform + methanol + Formic acid       | 9.5:0.5:0.                    | 3                                         |
